# Supplementary material for: Integrated diagnostic pathway for patients referred with suspected OSA: a model for collaboration across the primary–secondary care interface
Source: HighWire-hosted journal article supplement (doi:10.1136/bmjresp-2020-000743), 2020-11-01
Supplement: bmjresp-2020-000743supp002_data_supplement.pdf [file bmjresp-2020-000743supp002_data_supplement.pdf]

**OLS2**

Components of the Sleep Disorders Questionnaire completed by patients referred along the community OSA pathway

| <b>Components of Sleep Disorders Questionnaire</b>                                                                                                                  |
|---------------------------------------------------------------------------------------------------------------------------------------------------------------------|
| 1. Demographic Details                                                                                                                                              |
| 2. Anthropometric Measurements (height, weight, body mass index)                                                                                                    |
| 3. Past Medical and Social History (including alcohol, tobacco and caffeine consumption)                                                                            |
| 4. Assessment of Somnolence using validated questionnaires:<br>(i) Epworth Sleepiness Scale (ESS)<br>(ii) Sleepiness-Wakefulness Inability and Fatigue Test (SWIFT) |
| 5. OSA and upper airway symptoms (e.g. snoring, witnessed or experience apnoeas, rhinitis or previous upper airway surgery)                                         |
| 6. Assessment of sleep schedule and sleep hygiene                                                                                                                   |
| 7. Screening for other sleep problems: Insomnia, Parasomnias, Movement Disorders                                                                                    |
