# Supplementary material for: Integrated diagnostic pathway for patients referred with suspected OSA: a model for collaboration across the primary–secondary care interface
Source: HighWire-hosted journal article supplement (doi:10.1136/bmjresp-2020-000743), 2020-11-01
Supplement: bmjresp-2020-000743supp003_data_supplement.pdf [file bmjresp-2020-000743supp003_data_supplement.pdf]

**OLS3**

*Breakdown of final diagnosis in each pathway.* \*Upper airways flow limitation represents periods of airflow limitation without accompanying desaturation; if accompanied by somnolence it is termed upper airways resistance syndrome. \*\*Overlap refers to patients with evidence of OSA and hypoventilation from any cause. AHI = apnoea-hypopnea index

| Diagnosis                                | Frequency % cases (number)           |                                  |
|------------------------------------------|--------------------------------------|----------------------------------|
|                                          | Conventional Hospital Pathway n= 102 | Community Outreach pathway n= 70 |
| Normal Study                             | 7.8% (8)                             | 18.6% (13)                       |
| Upper Airways Flow Limitation* / Snoring | 40.2% (41)                           | 24.3% (17)                       |
| Mild OSA (AHI 5 – 14 events/hr)          | 17.6% (18)                           | 24.3% (17)                       |
| Moderate OSA (AHI 15 – 29 events/hr)     | 14.7% (15)                           | 17.1% (12)                       |
| Severe OSA (AHI ≥ 30 events/hr)          | 11.8% (12)                           | 11.4% (8)                        |
| Hypoventilation / Overlap**              | 7.8% (8)                             | 2.9% (2)                         |
| Inconclusive                             |                                      | 1.4% (1)                         |
