# Supplementary figures and images for: Integrated diagnostic pathway for patients referred with suspected OSA: a model for collaboration across the primary–secondary care interface
Source: HighWire-hosted journal article supplement (doi:10.1136/bmjresp-2020-000743), 2020-11-01

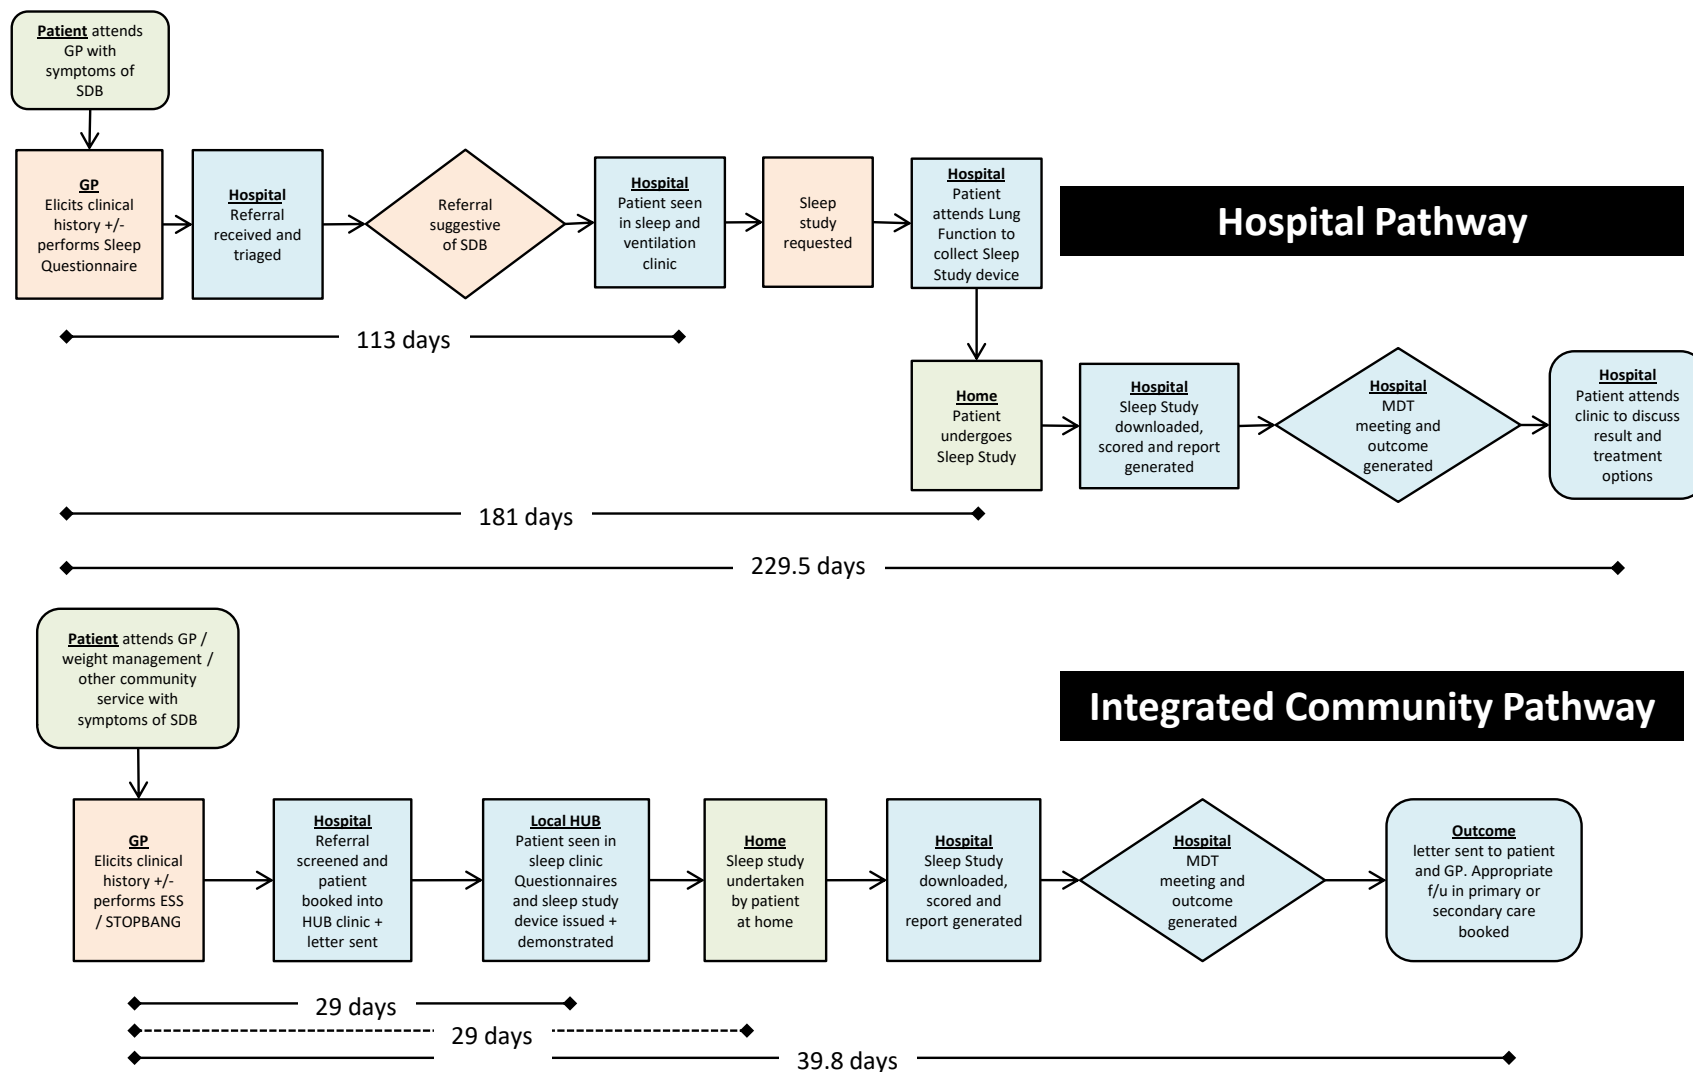

Supplement 1: Process Maps for Community and Hospital Pathway

Supplement: bmjresp-2020-000743supp001_data_supplement.pdf [file bmjresp-2020-000743supp001_data_supplement.pdf]
